# Supplementary material
Source: Springer Nature journal article supplement (https://www.springermedizin.de/resource/supplementary/12916_2010_274_MOESM7_ESM.pdf/9599528)
Supplement: MOESM7 [file 9599528]

3421 references identified and screened  
- 3419 from electronic database search  
- 2 by citation tracking

3392 excluded as inclusion criteria clearly not met (screening of titles and abstracts)

29 potentially relevant publications formally assessed for eligibility

6 not meeting inclusion criteria  
- 4 not original studies  
- 2 did not investigate predefined topics

23 publications included reporting 22 studies
